# Supplementary material
Source: PubMed Central journal article supplement (PMC5756688)

Table E1: Conversion between ELISA and Universal Allergen Standards (UAS)

## Conversion from ELISA to Universal Allergen Standards (UAS)

| ALLERGEN | ELISA morbidity cut-points ( $\mu\text{g/g}$ ) | ELISA ( $\mu\text{g/g}$ ) to (ng/ml) $\times(1000/20)$ | Regression converts ELISA to UAS <sup>1</sup> (ng/ml) | Regression converts ELISA to UAS <sup>1</sup> (ng/ml) | UAS conversion from (ng/ml) to ( $\mu\text{g/g}$ ) $\times(20/1000)$ |
|----------|------------------------------------------------|--------------------------------------------------------|-------------------------------------------------------|-------------------------------------------------------|----------------------------------------------------------------------|
| Canf1    | 10.0                                           | 500                                                    | $y=0.22x-4.56$                                        | 105                                                   | 2.1088                                                               |
| Feld1    | 8.0                                            | 400                                                    | $y=0.38x+7.56$                                        | 159.6                                                 | 3.1912                                                               |

$y = \text{UAS} / \text{MARIA}$

$x = \text{ELISA}$

## Conversion from Universal Allergen Standards (UAS) to ELISA

| ALLERGEN | UAS / MARIA ( $\mu\text{g/g}$ ) | UAS / MARIA ( $\mu\text{g/g}$ ) to (ng/ml) $\times(1000/20)$ | Regression converts ELISA to UAS <sup>1</sup> (ng/ml) | Regression converts ELISA to UAS <sup>1</sup> (ng/ml) | ELISA conversion from (ng/ml) to ( $\mu\text{g/g}$ ) $\times(20/1000)$ |
|----------|---------------------------------|--------------------------------------------------------------|-------------------------------------------------------|-------------------------------------------------------|------------------------------------------------------------------------|
| Canf1    | 2.11                            | 105.5                                                        | $x = (y + 4.56)/0.22$                                 | 500                                                   | 10.0                                                                   |
| Feld1    | 3.19                            | 159.5                                                        | $x = (y - 7.56)/0.38$                                 | 400                                                   | 8.0                                                                    |

$y = \text{UAS} / \text{MARIA}$

$x = \text{ELISA}$

## Reference :

1. Filep S, Tsay A, Vailes L, et al. A multi-allergen standard for the calibration of immunoassays: CREATE principles applied to eight purified allergens. *Allergy*. 2012;67(2):235-241.

Table E2: Exposure Distributions

| Statistic     | Dog<br>( $\mu\text{g/g UAS}$ ) | Cat<br>( $\mu\text{g/g UAS}$ ) |
|---------------|--------------------------------|--------------------------------|
| Minimum       | 0.009*                         | 0.003*                         |
| 1st Pctl      | 0.009*                         | 0.003*                         |
| 5th Pctl      | 0.009*                         | 0.003*                         |
| 10th Pctl     | 0.009*                         | 0.009*                         |
| 20th Pctl     | 0.032                          | 0.028                          |
| 30th Pctl     | 0.068                          | 0.064                          |
| 40th Pctl     | 0.178                          | 0.125                          |
| <b>Median</b> | <b>0.451</b>                   | <b>0.260</b>                   |
| 60th Pctl     | 1.211                          | 0.646                          |
| 70th Pctl     | 4.74                           | 3.16                           |
| 80th Pctl     | 16.3                           | 22.4                           |
| 90th Pctl     | 48.0                           | 110.1                          |
| 95th Pctl     | 96.5                           | 234.9                          |
| 99th Pctl     | 268.1                          | 751.1                          |
| Maximum       | 1216.4                         | 2944.7                         |

\*<LLOD

Dog Exposure > 2.11 ( $\mu\text{g/g UAS}$ ) = 36.0 percentile

Cat Exposure > 3.19 ( $\mu\text{g/g UAS}$ ) = 29.8 percentile

Table E3: Exposure and Sensitivity Associations with Asthma and Asthma Attacks (n=5,238)

| Exposure | Outcome*                        | Model      | Not Sensitive      |                    |                            |      | Sensitive         |                    |                            |       | interaction p |
|----------|---------------------------------|------------|--------------------|--------------------|----------------------------|------|-------------------|--------------------|----------------------------|-------|---------------|
|          |                                 |            | Not Exposed (% SE) | Yes Exposed (% SE) | Exposure effect (% 95% CI) | p    | No Exposed (% SE) | Yes Exposed (% SE) | Exposure effect (% 95% CI) | p     |               |
| Dog      | Current asthma                  | Unadjusted | 6.7<br>(0.69)      | 7.4<br>(1.36)      | 0.7<br>(-2.5,3.9)          | 0.67 | 20.1<br>(4.34)    | 32.6<br>(4.77)     | 12.5<br>( 3.6,21.4)        | 0.006 | 0.02          |
|          |                                 | Adjusted** | 6.3<br>(0.78)      | 6.7<br>(1.46)      | 0.4<br>(-2.9,3.7)          | 0.81 | 18.5<br>(4.06)    | 32.7<br>(4.73)     | 14.2<br>( 4.2,24.2)        | 0.005 | 0.007         |
|          | Asthma Attack in Past 12 months | Unadjusted | 3.6<br>(0.42)      | 4.3<br>(0.88)      | 0.7<br>(-1.5,3.0)          | 0.53 | 13.0<br>(3.46)    | 23.3<br>(4.14)     | 10.3<br>( 0.6,20.1)        | 0.04  | 0.07          |
|          |                                 | Adjusted   | 3.0<br>(0.50)      | 3.3<br>(0.92)      | 0.3<br>(-1.8,2.4)          | 0.76 | 10.7<br>(2.54)    | 20.2<br>(4.58)     | 9.5<br>(-1.4,20.4)         | 0.09  | 0.10          |
| Cat      | Current asthma                  | Unadjusted | 7.3<br>(0.60)      | 7.2<br>(1.26)      | -0.2<br>(-2.8,2.4)         | 0.89 | 20.2<br>(3.42)    | 25.5<br>(4.81)     | 5.3<br>(-5.9,16.5)         | 0.35  | 0.38          |
|          |                                 | Adjusted   | 7.1<br>(0.75)      | 6.0<br>(1.36)      | -1.1<br>(-3.9,1.6)         | 0.41 | 19.7<br>(3.22)    | 23.6<br>(4.47)     | 3.9<br>(-7.3,15.1)         | 0.49  | 0.42          |
|          | Asthma Attack in Past 12 months | Unadjusted | 4.3<br>(0.41)      | 4.1<br>(0.61)      | -0.2<br>(-1.6,1.1)         | 0.77 | 12.2<br>(2.43)    | 17.5<br>(4.35)     | 5.3<br>(-5.2,15.9)         | 0.32  | 0.31          |
|          |                                 | Adjusted   | 3.8<br>(0.49)      | 2.7<br>(0.66)      | -1.1<br>(-2.2,0.0)         | 0.04 | 10.3<br>(1.88)    | 13.9<br>(3.57)     | 3.6<br>(-5.4,12.6)         | 0.44  | 0.31          |

\* Outcomes for those with physician diagnosed asthma and who still have asthma.

\*\* Adjusted for Age, Gender, Race/Ethnicity, PIR (Poverty Index Ratio), Cotinine and Endotoxin

**Supplemental Figure Legends**

Figure E1: Association between Exposure and Sensitivity. Numbers are odds ratios and 95% Confidence Intervals

Figure E1

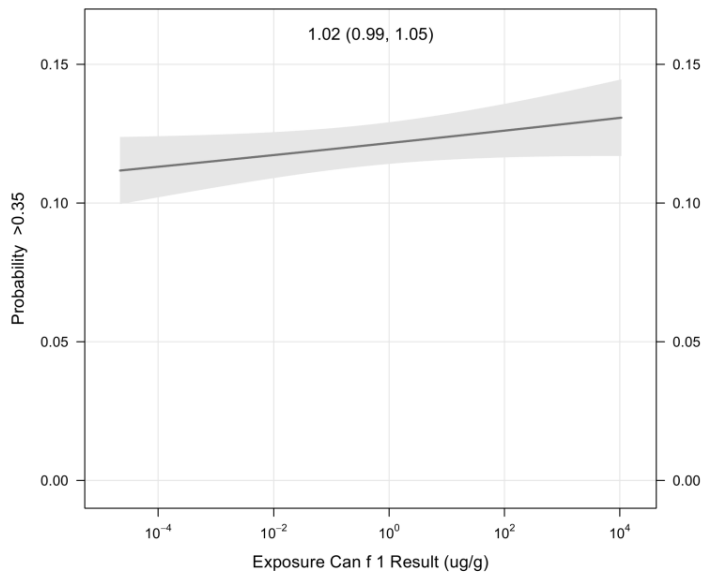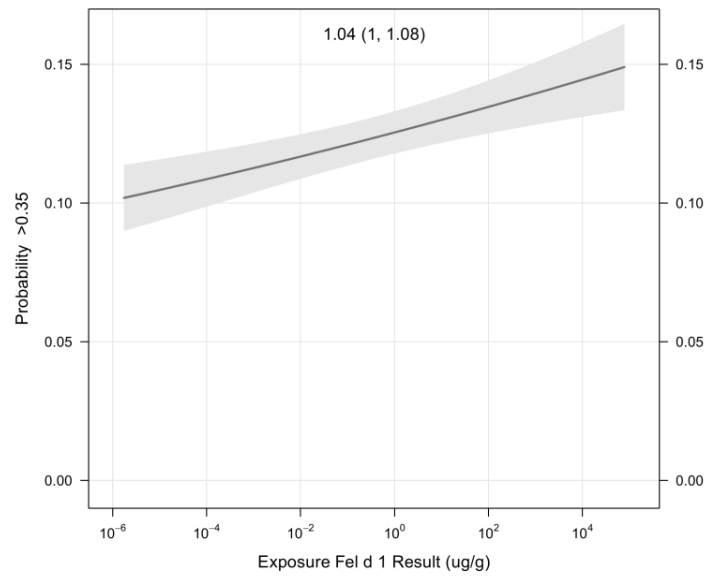

Supplement: NIHMS891448-supplement-supplement_1.pdf [file NIHMS891448-supplement-supplement_1.pdf]
